# Supplementary material for: Solitumergosterol A, a unique 6/6/6/6/5 steroid from the deep-sea-derived Penicillium solitum MCCC 3A00215
Source: Royal Society of Chemistry journal article supplement (doi:10.1039/d1ob01392k), 2021-01-01
Supplement: d1ob01392k1.pdf [file d1ob01392k1.pdf]

## Supporting Information

Solitumergosterol A, a unique 6/6/6/6/5 steroid from the deep-sea-derived *Penicillium solitum* MCCC 3A00215

Zhi-Hui He <sup>a</sup>, Chun-Lan Xie <sup>a</sup>, You-Jia Hao <sup>a</sup>, Lin Xu <sup>a</sup>, Man-Yi Hu <sup>a</sup>, Shu-Jing Li <sup>a</sup>, Chao-Feng Wang <sup>a</sup>, Tian-Hua Zhong <sup>a</sup> and Xian-Wen Yang <sup>a,\*</sup>

<sup>a</sup> Key Laboratory of Marine Biogenetic Resources, Third Institute of Oceanography, Ministry of Natural Resources, 184 Daxue Road, Xiamen 361005, China

---

\* Corresponding author.  
E-mail address: yangxianwen@tio.org.cn (X.-W.Y.);

# Content

1. General Experimental Procedures
2. Fungal Material
3. Fermentation, Extraction, and Isolation
4. Biological Assay

4.1 Cytotoxic experiment

4.2 RXR $\alpha$  transcriptional activity

5. ECD Calculation

Table S1. Energies analysis for **1a** at MMFF94 force field.

Table S2. Standard orientations at BP86/6-311G(d,p) level in Acetonitrile.

6. Figures

Figure S1. Effects of **1** on the transcriptional activities of RXR $\alpha$ .

Figure S2. The CD spectra of **1** in ACN.

Figure S3.  $^1\text{H}$  NMR spectrum of **1** in  $\text{CDCl}_3$ .

Figure S4.  $^{13}\text{C}$  NMR spectrum of **1** in  $\text{CDCl}_3$ .

Figure S5. HSQC NMR spectrum of **1** in  $\text{CDCl}_3$ .

Figure S6. COSY NMR spectrum of **1** in  $\text{CDCl}_3$ .

Figure S7. HMBC NMR spectrum of **1** in  $\text{CDCl}_3$ .

Figure S8. NOESY NMR spectrum of **1** in  $\text{CDCl}_3$ .

Figure S9. The HR-ESI-MS spectrum of **1**.

Figure S10. A biosynthetic proposal for **1**.

## 1. General Experimental Procedures

NMR spectra were recorded on Bruker 400 MHz spectrometer using TMS as an internal standard. Chemical shifts were recorded in  $\delta$  values using solvent signals ( $\text{CDCl}_3$ :  $\delta_{\text{H}}$  7.26/ $\delta_{\text{C}}$  77.1) as references. The HRESIMS spectra were measured on a Waters Xevo G2 Q-TOF mass spectrometer. Optical rotations were measured with an Anton Paar MCP100 polarimeter. ECD spectra were measured on a JASCO J-810 CD spectrometer. Column chromatography (CC) was performed on silica gel (Qingdao Marine Chemistry Co., Ltd., Qingdao, China), Sephadex LH-20 (Amersham Pharmacia Biotech AB, Uppsala, Sweden), and ODS (50  $\mu\text{m}$ , Daiso, Japan), respectively. Preparative HPLC separations were performed on an Agilent technologies 1260 infinity instrument equipped with DAD detector using semi-preparative chromatographic column (COSMOSIL 5  $\text{C}_{18}$ -MS-II, 10 mm i.d.  $\times$  150 mm, Nacalai Tesque, Japan).

## 2. Fungal Material

The fungus was isolated from a sediment sample at a depth of 3034 m from the Northwest Atlantic Ocean (W 44.9801°, N 14.7532°). It was identified to be *Penicillium solitum* (GenBank accession number FJ798652) as the 16S rRNA gene sequence alignment demonstrated that it was similar to *P. solitum* ATCC 9923 (GenBank accession number IF00776501). The strain was preserved at the Marine Culture Collection of China (Xiamen, China) and numbered MCCC 3A00215.

## 3. Fermentation, Extraction, and Isolation

Large-scale fermentation was carried out in 48 Erlenmeyer flasks (1 L) each containing oats (80 g) and tape water (120 mL, 3% marine salt). After incubation for 30 days, the fermented broth was extracted with EtOAc for three times. The filtrate was concentrated under reduced pressure to give a crude extract (200 g), which subjected to column chromatography (CC) on silica gel using petroleum ether (PE),  $\text{CH}_2\text{Cl}_2$ , EtOAc to provide a EtOAc-soluble extract (114.5 g). The EtOAc part was subjected to medium pressure liquid chromatography (MPLC, 460 mm  $\times$  46 mm) by silica gel with gradient elution consisting  $\text{CH}_2\text{Cl}_2/\text{MeOH}$  (100% $\rightarrow$ 70%, 6h; 70% $\rightarrow$ 50%, 1h, 30 mL/min) to obtain five fractions (Fr.1-Fr.5). Fr.2 (4 g) was subjected to ODS chromatography (310 mm  $\times$  5 mm) eluted by gradient  $\text{MeOH}/\text{H}_2\text{O}$  (10% $\rightarrow$ 40%, 4h; 40% $\rightarrow$ 60%, 6h; 60% $\rightarrow$ 100%, 5h) and obtain 13 subfractions. Fr.2.11 was purified by Sephadex LH-20 (1.5 m  $\times$  2 cm, MeOH) and followed by semi-preparative HPLC eluted with  $\text{MeOH}/\text{H}_2\text{O}$  (40% $\rightarrow$ 100%) to lead to the isolation of compound **1** (3.0 mg).

## 4. Biological Assay

### 4.1 Cytotoxic experiment

The *in vitro* cytotoxic activities of **1** were conducted on 17 human tumor cell lines A431, A549, MB231, MCF-7, PANC1, HepG2, HCT116, H460, H1299, QGY-7701, BGC823, SKGT4, A375, U2OS, HL-60, K562, and KYSE450 by MTT method. Paclitaxel was used as a positive control, and DMSO was used as a negative control. Different cancer cells were incubated to 96-well cell plates and cultured for 24 h. Thereafter, the cells were treated with different concentrations of **1**. After 48h, 20  $\mu\text{L}$  of MTT solution was added and the

incubation continued for another 4 h. The supernatant was discarded softly, and the deposited formazan formed in the cells was dissolved with 100  $\mu$ L of DMSO. The absorbencies were measured at 490 nm. The percentage of cell growth rate was calculated as follows:

$$\text{Growth Rate (\%)} = (\text{OD}_{\text{sample}} - \text{OD}_{\text{blank}}) / (\text{OD}_{\text{control}} - \text{OD}_{\text{blank}}) \times 100\%$$

#### 4.2 RXR $\alpha$ transcriptional activity

The human renal epithelial cells were seeded to 96-well plates in DMEM containing 10% FBS at 37  $^{\circ}$ C. After 24 h, two target plasmids (30 ng pBind RXR $\alpha$  LBD and 60 ng PG5 LUC) were transfected by Liposome 2000 into the cell. After the cells adhere to the wall, they were exposed to compound **1** for 16 h. Then the cells were rinsed with PBS and lysed by buffered solution on the oscillating platform for 15 min. According to the introduction of the Dual-Luciferase Reporter Assay System kit, the activities of firefly luciferase (FL) and rellina luciferase (RL) were checked. The activity fold was calculated as the relative luciferase activities ratio between sample and blank control. 9-*cis*-retinoic acid (9-*cis*) was used as agonist. Uvi30003 was used as antagonist.

$$\text{Relative luciferase activity (\%)} = \frac{\text{FL}}{\text{RL}} \times 100\%$$

#### 5. ECD Calculation

Conformational analysis was firstly performed *via* random searching in the Sybyl-X 2.0 using the MMFF94S force field with an energy cutoff of 7.0 kcal/mol and RMSD threshold of 0.2  $\text{\AA}$ . All conformers were consecutively optimized at PM6 and HF/6-31G(d) levels. Dominative conformers were re-optimized at B3LYP/6-31G(d) level in gas phase. The theoretical ECD spectra were calculated with the time-dependent density functional theory (TD-DFT) at BP86/6-311G(d,p) level in Acetonitrile using Gaussian 09 [1]. The ECD spectrum was simulated in SpecDis [2] by overlapping Gaussian functions for each transition.

#### References:

- [1] G.W.T. M. J. Frisch, H. B. Schlegel, G. E. Scuseria, M. A. Robb, J. R. Cheeseman, G. Scalmani, V. Barone, B. Mennucci, G. A. Petersson, H. Nakatsuji, M. Caricato, X. Li, H. P. Hratchian, A. F. Izmaylov, J. Bloino, G. Zheng, J. L. Sonnenberg, M. Hada, M. Ehara, K. Toyota, R. Fukuda, J. Hasegawa, M. Ishida, T. Nakajima, Y. Honda, O. Kitao, H. Nakai, T. Vreven, J. A. Montgomery, Jr., J. E. Peralta, F. Ogliaro, M. Bearpark, J. J. Heyd, E. Brothers, K. N. Kudin, V. N. Staroverov, R. Kobayashi, J. Normand, K. Raghavachari, A. Rendell, J. C. Burant, S. S. Iyengar, J. Tomasi, M. Cossi, N. Rega, J. M. Millam, M. Klene, J. E. Knox, J. B. Cross, V. Bakken, C. Adamo, J. Jaramillo, R. Gomperts, R. E. Stratmann, O. Yazyev, A. J. Austin, R. Cammi, C. Pomelli, J. W. Ochterski, R. L. Martin, K. Morokuma, V. G. Zakrzewski, G. A. Voth, P. Salvador, J. J. Dannenberg, S. Dapprich, A. D. Daniels, O. Farkas, J. B. Foresman, J. V. Ortiz, J. Cioslowski, D. J. Fox., Gaussian 09 Revision D.01, Wallingford, CT, 2009.
- [2] T. Bruhn, A. Schaumlöffel, Y. Hemberger, G. Bringmann, Chirality 25 (2013) 243-249.

**Table S1.** Energies analysis for **1a** at MMFF94 force field.

| Configuration | Conformer | Structure                                                                          | E<br>(kcal/mol) | Population<br>(%) |
|---------------|-----------|------------------------------------------------------------------------------------|-----------------|-------------------|
| <b>1a</b>     | 1         | 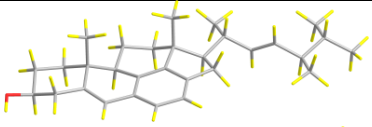 | 112.03          | 80.7              |
| <b>1a</b>     | 2         |  | 113.02          | 15.2              |
| <b>1a</b>     | 3         |  | 114.05          | 2.7               |

**Table S2.** Standard orientations at BP86/6-311G(d,p) level in Acetonitrile.

| Conformer 1a-1                                                                     |               |             |                         |           |           |  |
|------------------------------------------------------------------------------------|---------------|-------------|-------------------------|-----------|-----------|--|
| 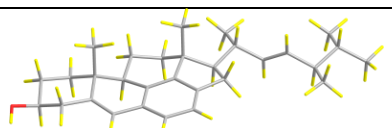 |               |             |                         |           |           |  |
| SCF Energy (BP86): -1243.99364465 Hartree: -780617.79136232 kcal/mol               |               |             |                         |           |           |  |
| Center Number                                                                      | Atomic Number | Atomic Type | Coordinates (Angstroms) |           |           |  |
|                                                                                    |               |             | X                       | Y         | Z         |  |
| 1                                                                                  | 6             | 0           | 6.506429                | -1.403851 | -0.248698 |  |
| 2                                                                                  | 6             | 0           | 6.928829                | -0.046482 | -0.795576 |  |
| 3                                                                                  | 6             | 0           | 6.172618                | 1.065389  | -0.054808 |  |
| 4                                                                                  | 6             | 0           | 4.669834                | 0.891417  | -0.074418 |  |
| 5                                                                                  | 6             | 0           | 4.110811                | -0.507260 | 0.249294  |  |
| 6                                                                                  | 6             | 0           | 4.994273                | -1.606590 | -0.407333 |  |
| 7                                                                                  | 6             | 0           | 3.855043                | 1.953521  | -0.239896 |  |
| 8                                                                                  | 6             | 0           | 2.404022                | 1.876983  | -0.094100 |  |
| 9                                                                                  | 6             | 0           | 1.822558                | 0.594211  | -0.009946 |  |
| 10                                                                                 | 6             | 0           | 2.671203                | -0.614314 | -0.346949 |  |
| 11                                                                                 | 6             | 0           | 0.189949                | 2.892567  | 0.093578  |  |
| 12                                                                                 | 6             | 0           | -0.328658               | -0.795067 | 0.328273  |  |
| 13                                                                                 | 6             | 0           | 0.424963                | -1.882153 | -0.471530 |  |
| 14                                                                                 | 6             | 0           | 1.923626                | -1.940983 | -0.086652 |  |
| 15                                                                                 | 6             | 0           | -0.373462               | 1.622557  | 0.194688  |  |
| 16                                                                                 | 6             | 0           | -1.816229               | 1.172097  | 0.209404  |  |
| 17                                                                                 | 6             | 0           | -1.728144               | -0.325626 | -0.229986 |  |
| 18                                                                                 | 6             | 0           | -2.995369               | -1.136955 | 0.137119  |  |
| 19                                                                                 | 6             | 0           | -4.226617               | -0.472092 | -0.438323 |  |
| 20                                                                                 | 6             | 0           | -2.937766               | -2.600296 | -0.346916 |  |
| 21                                                                                 | 6             | 0           | -5.268830               | -0.017868 | 0.263381  |  |
| 22                                                                                 | 6             | 0           | -6.498652               | 0.651551  | -0.305044 |  |
| 23                                                                                 | 6             | 0           | -7.793068               | -0.128611 | 0.070004  |  |
| 24                                                                                 | 6             | 0           | -9.070328               | 0.570262  | -0.423756 |  |
| 25                                                                                 | 6             | 0           | -7.751557               | -1.570741 | -0.459097 |  |
| 26                                                                                 | 6             | 0           | 4.110734                | -0.667328 | 1.790894  |  |
| 27                                                                                 | 6             | 0           | -6.535998               | 2.121808  | 0.162667  |  |
| 28                                                                                 | 6             | 0           | -0.437271               | -1.187864 | 1.822806  |  |
| 29                                                                                 | 8             | 0           | 8.339546                | 0.069918  | -0.619286 |  |
| 30                                                                                 | 6             | 0           | 1.580582                | 3.011713  | -0.024298 |  |
| 31                                                                                 | 6             | 0           | 0.456670                | 0.496447  | 0.193436  |  |
| 32                                                                                 | 1             | 0           | 6.808279                | -1.462095 | 0.805404  |  |

---

|    |   |   |           |           |           |
|----|---|---|-----------|-----------|-----------|
| 33 | 1 | 0 | 7.050675  | -2.196147 | -0.776059 |
| 34 | 1 | 0 | 6.676074  | -0.000547 | -1.869398 |
| 35 | 1 | 0 | 6.436339  | 2.050486  | -0.463832 |
| 36 | 1 | 0 | 6.540427  | 1.050182  | 0.983472  |
| 37 | 1 | 0 | 4.763698  | -1.639545 | -1.482097 |
| 38 | 1 | 0 | 4.712684  | -2.585478 | -0.001497 |
| 39 | 1 | 0 | 4.290038  | 2.936772  | -0.419263 |
| 40 | 1 | 0 | 2.821201  | -0.548339 | -1.439858 |
| 41 | 1 | 0 | -0.433957 | 3.783473  | 0.084323  |
| 42 | 1 | 0 | -0.017151 | -2.872813 | -0.316164 |
| 43 | 1 | 0 | 0.335464  | -1.661423 | -1.544896 |
| 44 | 1 | 0 | 2.401774  | -2.746049 | -0.656516 |
| 45 | 1 | 0 | 2.008159  | -2.225471 | 0.967841  |
| 46 | 1 | 0 | -2.456239 | 1.759496  | -0.457278 |
| 47 | 1 | 0 | -2.263211 | 1.253274  | 1.211868  |
| 48 | 1 | 0 | -1.638187 | -0.330491 | -1.327798 |
| 49 | 1 | 0 | -3.100032 | -1.140693 | 1.230883  |
| 50 | 1 | 0 | -4.246454 | -0.385463 | -1.528514 |
| 51 | 1 | 0 | -3.877052 | -3.115042 | -0.116673 |
| 52 | 1 | 0 | -2.125047 | -3.157949 | 0.128001  |
| 53 | 1 | 0 | -2.788202 | -2.650948 | -1.432914 |
| 54 | 1 | 0 | -5.247560 | -0.105800 | 1.353681  |
| 55 | 1 | 0 | -6.415218 | 0.646214  | -1.402907 |
| 56 | 1 | 0 | -7.837982 | -0.172432 | 1.170235  |
| 57 | 1 | 0 | -9.041406 | 0.718633  | -1.511579 |
| 58 | 1 | 0 | -9.222011 | 1.547789  | 0.044249  |
| 59 | 1 | 0 | -9.952451 | -0.040917 | -0.199256 |
| 60 | 1 | 0 | -8.644579 | -2.126258 | -0.149362 |
| 61 | 1 | 0 | -6.871383 | -2.111232 | -0.098063 |
| 62 | 1 | 0 | -7.719426 | -1.580928 | -1.556916 |
| 63 | 1 | 0 | 3.814204  | -1.679174 | 2.089271  |
| 64 | 1 | 0 | 3.419259  | 0.044538  | 2.254123  |
| 65 | 1 | 0 | 5.105829  | -0.484358 | 2.208675  |
| 66 | 1 | 0 | -6.679520 | 2.186078  | 1.249346  |
| 67 | 1 | 0 | -5.592000 | 2.622808  | -0.076804 |
| 68 | 1 | 0 | -7.344003 | 2.683762  | -0.316185 |
| 69 | 1 | 0 | -0.982383 | -2.130958 | 1.948910  |
| 70 | 1 | 0 | -0.958641 | -0.416739 | 2.399986  |
| 71 | 1 | 0 | 0.551265  | -1.309428 | 2.275012  |
| 72 | 1 | 0 | 8.608458  | 0.936232  | -0.963384 |
| 73 | 1 | 0 | 2.032736  | 3.998979  | -0.093092 |

---

---

**Conformer 1a-2**

---

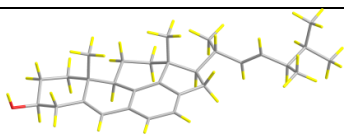

SCF Energy (BP86): -1243.99291910 Hartree: -780617.336104201 kcal/mol

---

| Center<br>Number | Atomic<br>Number | Atomic<br>Type | Coordinates (Angstroms) |           |           |
|------------------|------------------|----------------|-------------------------|-----------|-----------|
|                  |                  |                | X                       | Y         | Z         |
| 1                | 6                | 0              | 6.533760                | -1.381835 | -0.262636 |
| 2                | 6                | 0              | 6.959173                | -0.002009 | -0.764960 |
| 3                | 6                | 0              | 6.187501                | 1.085149  | -0.004029 |
| 4                | 6                | 0              | 4.685753                | 0.900395  | -0.034698 |
| 5                | 6                | 0              | 4.129857                | -0.509320 | 0.244754  |
| 6                | 6                | 0              | 5.022313                | -1.586876 | -0.435078 |
| 7                | 6                | 0              | 3.867262                | 1.963241  | -0.175607 |
| 8                | 6                | 0              | 2.415571                | 1.876078  | -0.044321 |
| 9                | 6                | 0              | 1.838834                | 0.589032  | -0.002404 |
| 10               | 6                | 0              | 2.695722                | -0.605726 | -0.366784 |
| 11               | 6                | 0              | 0.195708                | 2.876912  | 0.152973  |
| 12               | 6                | 0              | -0.310083               | -0.817971 | 0.273260  |
| 13               | 6                | 0              | 0.456362                | -1.878706 | -0.549371 |
| 14               | 6                | 0              | 1.951385                | -1.942231 | -0.151484 |
| 15               | 6                | 0              | -0.363311               | 1.602307  | 0.211494  |
| 16               | 6                | 0              | -1.804234               | 1.145932  | 0.197294  |
| 17               | 6                | 0              | -1.704566               | -0.336850 | -0.287419 |
| 18               | 6                | 0              | -2.973354               | -1.163638 | 0.036719  |
| 19               | 6                | 0              | -4.198118               | -0.484767 | -0.535646 |
| 20               | 6                | 0              | -2.904320               | -2.610440 | -0.493419 |
| 21               | 6                | 0              | -5.256744               | -0.062430 | 0.161800  |
| 22               | 6                | 0              | -6.486019               | 0.588488  | -0.428558 |
| 23               | 6                | 0              | -7.729934               | -0.352625 | -0.351261 |
| 24               | 6                | 0              | -8.202982               | -0.643906 | 1.081835  |
| 25               | 6                | 0              | -8.894788               | 0.165796  | -1.209451 |
| 26               | 6                | 0              | 4.115672                | -0.713049 | 1.781096  |
| 27               | 6                | 0              | -6.714170               | 1.973446  | 0.209807  |
| 28               | 6                | 0              | -0.434841               | -1.255093 | 1.754147  |
| 29               | 8                | 0              | 8.368285                | 0.199940  | -0.687020 |
| 30               | 6                | 0              | 1.586788                | 3.005033  | 0.051210  |
| 31               | 6                | 0              | 0.471556                | 0.479900  | 0.185095  |
| 32               | 1                | 0              | 6.819519                | -1.478678 | 0.796526  |
| 33               | 1                | 0              | 7.084818                | -2.156565 | -0.808834 |

---



---

|    |   |   |           |           |           |
|----|---|---|-----------|-----------|-----------|
| 34 | 1 | 0 | 6.730615  | 0.076431  | -1.835204 |
| 35 | 1 | 0 | 6.459630  | 2.074844  | -0.387116 |
| 36 | 1 | 0 | 6.536468  | 1.050868  | 1.044021  |
| 37 | 1 | 0 | 4.802560  | -1.588707 | -1.512546 |
| 38 | 1 | 0 | 4.740299  | -2.578473 | -0.061393 |
| 39 | 1 | 0 | 4.299560  | 2.952547  | -0.324360 |
| 40 | 1 | 0 | 2.855148  | -0.507377 | -1.455853 |
| 41 | 1 | 0 | -0.431853 | 3.765216  | 0.163792  |
| 42 | 1 | 0 | 0.376371  | -1.628584 | -1.616991 |
| 43 | 1 | 0 | 0.017263  | -2.875184 | -0.425915 |
| 44 | 1 | 0 | 2.026360  | -2.256097 | 0.895442  |
| 45 | 1 | 0 | 2.438325  | -2.729199 | -0.738967 |
| 46 | 1 | 0 | -2.439899 | 1.751037  | -0.457442 |
| 47 | 1 | 0 | -2.262339 | 1.193580  | 1.196882  |
| 48 | 1 | 0 | -1.600546 | -0.306838 | -1.383613 |
| 49 | 1 | 0 | -3.093777 | -1.202685 | 1.128198  |
| 50 | 1 | 0 | -4.198099 | -0.358148 | -1.622308 |
| 51 | 1 | 0 | -2.735936 | -2.625197 | -1.577711 |
| 52 | 1 | 0 | -2.098536 | -3.181726 | -0.022902 |
| 53 | 1 | 0 | -3.846461 | -3.133470 | -0.296222 |
| 54 | 1 | 0 | -5.249941 | -0.184180 | 1.247498  |
| 55 | 1 | 0 | -6.290176 | 0.745020  | -1.499581 |
| 56 | 1 | 0 | -7.403273 | -1.307167 | -0.788715 |
| 57 | 1 | 0 | -8.575916 | 0.260794  | 1.576758  |
| 58 | 1 | 0 | -9.023559 | -1.371065 | 1.072039  |
| 59 | 1 | 0 | -7.402212 | -1.061558 | 1.702063  |
| 60 | 1 | 0 | -9.703123 | -0.573997 | -1.251202 |
| 61 | 1 | 0 | -8.574917 | 0.368780  | -2.238840 |
| 62 | 1 | 0 | -9.322105 | 1.090431  | -0.803199 |
| 63 | 1 | 0 | 5.104174  | -0.531634 | 2.215544  |
| 64 | 1 | 0 | 3.826137  | -1.735515 | 2.048567  |
| 65 | 1 | 0 | 3.412623  | -0.020903 | 2.256509  |
| 66 | 1 | 0 | -6.855620 | 1.899301  | 1.294412  |
| 67 | 1 | 0 | -5.845515 | 2.617936  | 0.036493  |
| 68 | 1 | 0 | -7.592584 | 2.476299  | -0.209315 |
| 69 | 1 | 0 | -0.966079 | -0.503210 | 2.347483  |
| 70 | 1 | 0 | -0.977646 | -2.203561 | 1.845997  |
| 71 | 1 | 0 | 0.548689  | -1.386581 | 2.214589  |
| 72 | 1 | 0 | 8.615371  | 0.142671  | 0.250540  |
| 73 | 1 | 0 | 2.035376  | 3.995594  | 0.014876  |

---

---

**Conformer 1a-3**

---

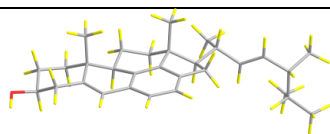

SCF Energy (BP86): -1243.99047270 Hartree: -780615.800965036 kcal/mol

---

| Center<br>Number | Atomic<br>Number | Atomic<br>Type | Coordinates (Angstroms) |           |           |
|------------------|------------------|----------------|-------------------------|-----------|-----------|
|                  |                  |                | X                       | Y         | Z         |
| 1                | 6                | 0              | -6.455014               | -1.280966 | 0.565589  |
| 2                | 6                | 0              | -6.822819               | 0.134767  | 0.990297  |
| 3                | 6                | 0              | -6.092062               | 1.145692  | 0.095578  |
| 4                | 6                | 0              | -4.593470               | 0.942802  | 0.054927  |
| 5                | 6                | 0              | -4.074573               | -0.493560 | -0.148575 |
| 6                | 6                | 0              | -4.939638               | -1.500416 | 0.662969  |
| 7                | 6                | 0              | -3.754372               | 1.998811  | 0.067112  |
| 8                | 6                | 0              | -2.314401               | 1.876798  | -0.142147 |
| 9                | 6                | 0              | -1.758416               | 0.580125  | -0.120212 |
| 10               | 6                | 0              | -2.607435               | -0.568658 | 0.383203  |
| 11               | 6                | 0              | -0.097710               | 2.820471  | -0.548572 |
| 12               | 6                | 0              | 0.350139                | -0.881172 | -0.419422 |
| 13               | 6                | 0              | -0.377649               | -1.864271 | 0.525992  |
| 14               | 6                | 0              | -1.895203               | -1.930614 | 0.225902  |
| 15               | 6                | 0              | 0.439746                | 1.535273  | -0.544354 |
| 16               | 6                | 0              | 1.872229                | 1.054656  | -0.588170 |
| 17               | 6                | 0              | 1.785125                | -0.385766 | 0.012171  |
| 18               | 6                | 0              | 3.015846                | -1.260482 | -0.332570 |
| 19               | 6                | 0              | 4.291536                | -0.556819 | 0.079790  |
| 20               | 6                | 0              | 2.970083                | -2.653002 | 0.328854  |
| 21               | 6                | 0              | 5.287311                | -0.232570 | -0.750484 |
| 22               | 6                | 0              | 6.599346                | 0.464843  | -0.444927 |
| 23               | 6                | 0              | 6.871842                | 0.725321  | 1.061328  |
| 24               | 6                | 0              | 7.242318                | -0.542618 | 1.849225  |
| 25               | 6                | 0              | 7.940066                | 1.812879  | 1.263148  |
| 26               | 6                | 0              | -4.156855               | -0.812066 | -1.662926 |
| 27               | 6                | 0              | 7.749229                | -0.275872 | -1.160827 |
| 28               | 6                | 0              | 0.372956                | -1.428904 | -1.868276 |
| 29               | 8                | 0              | -8.239173               | 0.263986  | 0.881763  |
| 30               | 6                | 0              | -1.478117               | 2.980479  | -0.372702 |
| 31               | 6                | 0              | -0.406659               | 0.433571  | -0.380672 |
| 32               | 1                | 0              | -6.981982               | -2.002438 | 1.201051  |
| 33               | 1                | 0              | -6.816257               | -1.440443 | -0.458769 |

---

---

|    |   |   |           |           |           |
|----|---|---|-----------|-----------|-----------|
| 34 | 1 | 0 | -6.507316 | 0.286006  | 2.037499  |
| 35 | 1 | 0 | -6.317886 | 2.173934  | 0.410294  |
| 36 | 1 | 0 | -6.517140 | 1.027890  | -0.913870 |
| 37 | 1 | 0 | -4.697599 | -2.521485 | 0.344807  |
| 38 | 1 | 0 | -4.650906 | -1.429539 | 1.721836  |
| 39 | 1 | 0 | -4.163751 | 3.004352  | 0.164263  |
| 40 | 1 | 0 | -2.700022 | -0.386289 | 1.469114  |
| 41 | 1 | 0 | 0.539440  | 3.694181  | -0.665832 |
| 42 | 1 | 0 | 0.039548  | -2.874925 | 0.451030  |
| 43 | 1 | 0 | -0.228671 | -1.537520 | 1.565161  |
| 44 | 1 | 0 | -2.039179 | -2.322014 | -0.787206 |
| 45 | 1 | 0 | -2.354804 | -2.661828 | 0.900821  |
| 46 | 1 | 0 | 2.557433  | 1.695160  | -0.023106 |
| 47 | 1 | 0 | 2.264396  | 1.020221  | -1.616000 |
| 48 | 1 | 0 | 1.754743  | -0.272871 | 1.107468  |
| 49 | 1 | 0 | 3.049298  | -1.398493 | -1.422055 |
| 50 | 1 | 0 | 4.369628  | -0.332055 | 1.144767  |
| 51 | 1 | 0 | 2.121496  | -3.247658 | -0.022312 |
| 52 | 1 | 0 | 3.886160  | -3.210496 | 0.104944  |
| 53 | 1 | 0 | 2.889962  | -2.568039 | 1.420105  |
| 54 | 1 | 0 | 5.161662  | -0.482701 | -1.807619 |
| 55 | 1 | 0 | 6.531065  | 1.458486  | -0.920425 |
| 56 | 1 | 0 | 5.938279  | 1.122679  | 1.484170  |
| 57 | 1 | 0 | 6.516373  | -1.347321 | 1.695113  |
| 58 | 1 | 0 | 8.228132  | -0.920522 | 1.553172  |
| 59 | 1 | 0 | 7.285279  | -0.327660 | 2.923594  |
| 60 | 1 | 0 | 7.666117  | 2.743499  | 0.751540  |
| 61 | 1 | 0 | 8.063254  | 2.041583  | 2.328422  |
| 62 | 1 | 0 | 8.919413  | 1.497863  | 0.883086  |
| 63 | 1 | 0 | -3.478313 | -0.167100 | -2.231221 |
| 64 | 1 | 0 | -5.169031 | -0.651428 | -2.047382 |
| 65 | 1 | 0 | -3.893018 | -1.855625 | -1.867798 |
| 66 | 1 | 0 | 7.850259  | -1.304641 | -0.798666 |
| 67 | 1 | 0 | 7.560229  | -0.324539 | -2.239605 |
| 68 | 1 | 0 | 8.709193  | 0.231679  | -1.018036 |
| 69 | 1 | 0 | -0.639905 | -1.569594 | -2.256665 |
| 70 | 1 | 0 | 0.880957  | -0.736359 | -2.548045 |
| 71 | 1 | 0 | 0.890493  | -2.394274 | -1.921168 |
| 72 | 1 | 0 | -8.473321 | 1.167237  | 1.147415  |
| 73 | 1 | 0 | -1.910600 | 3.978801  | -0.385488 |

---

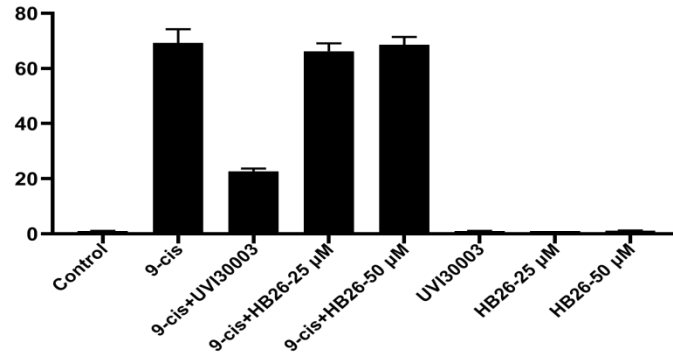

**Figure S1.** Effects of **1** on the transcriptional activities of RXR $\alpha$ .

Remarks :

#User: CD  
#Date: 2020/07/07  
#Instrument: 0536  
#DetectorType: PMT  
#DichOS Calibration Correction Curve: 0536/1  
#HV (CDDC channel): 0 v  
#Time per point: 0.25 s  
#Description: Sample 1  
#Concentration: 0 M  
#Pathlength: 10 mm  
#Temperature: --- C

**Figure S2.** The CD spectrum of **1** in ACN.

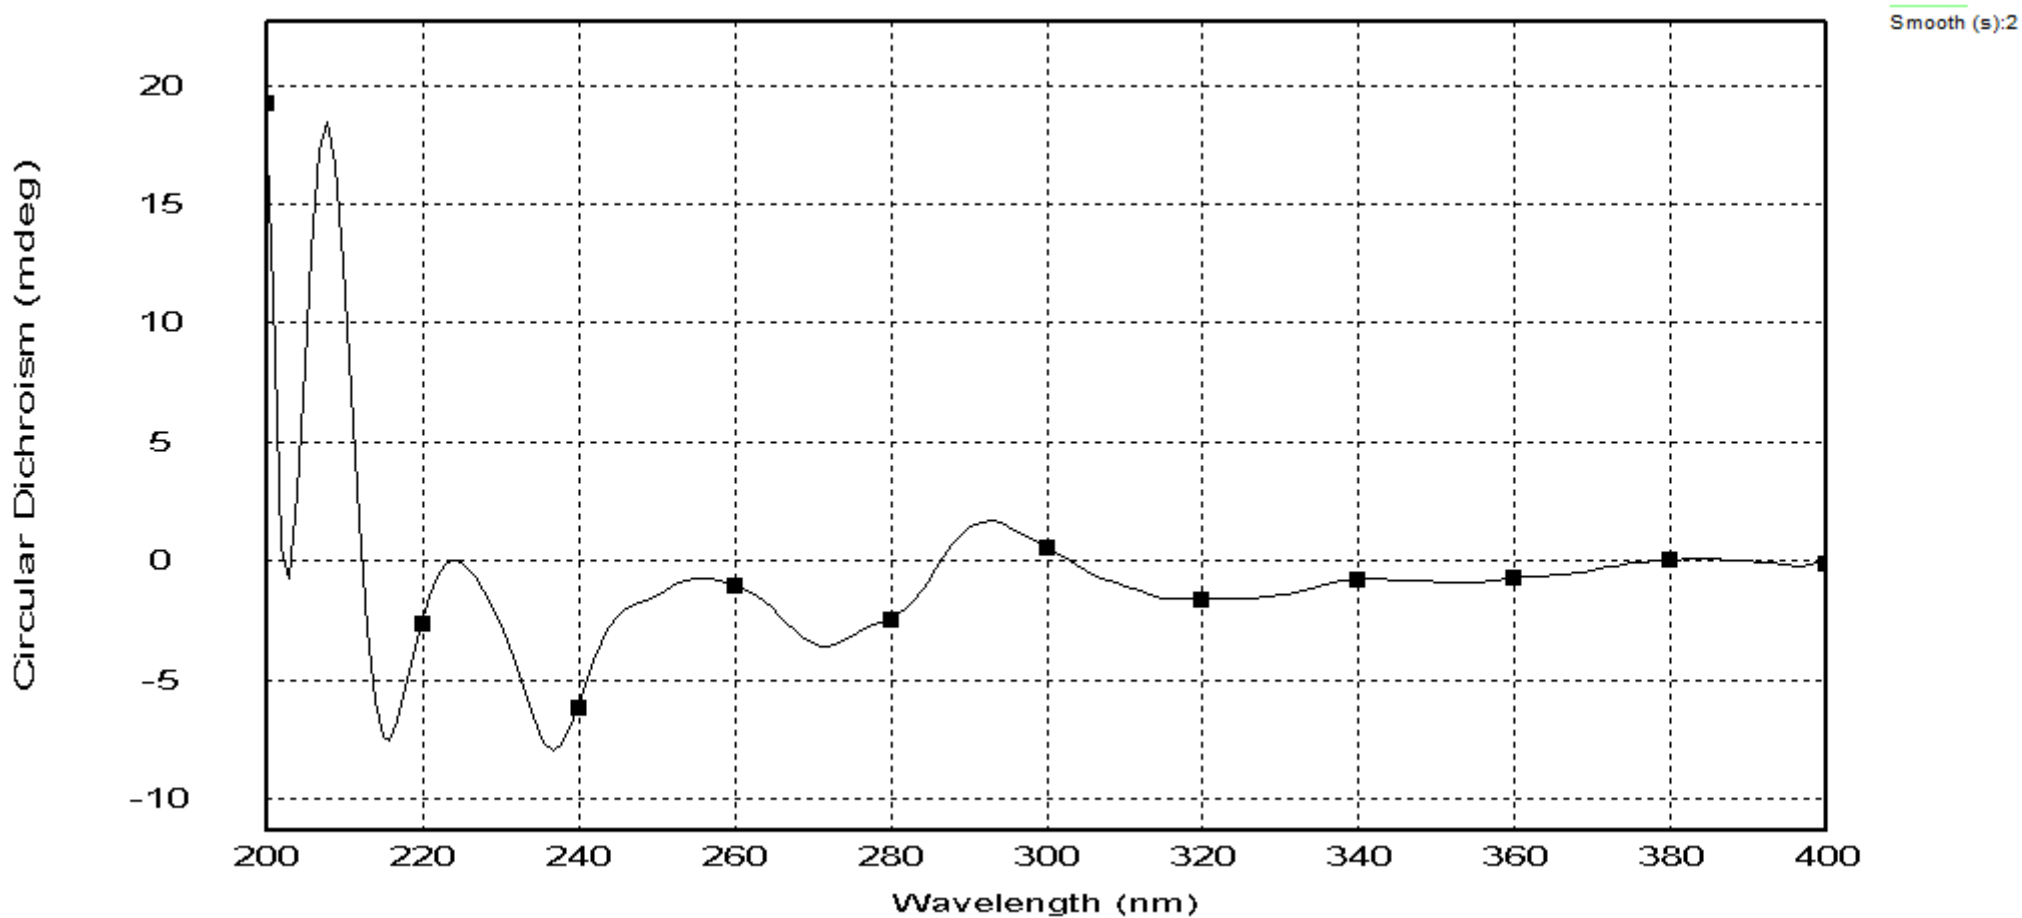

HB2-6 C 3mg H

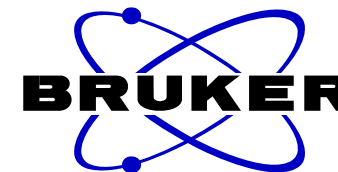

2.692  
2.684  
2.665  
2.634  
2.628  
2.609  
2.604  
2.598  
2.592  
2.567  
2.551  
2.537  
2.522  
2.376  
2.369  
2.645  
2.640  
2.347  
2.341  
2.311  
2.305  
2.246  
2.238  
2.229  
2.214  
2.206  
2.198  
2.017  
2.010  
2.004  
1.978  
1.947  
1.930  
1.915  
1.898  
1.881  
1.842  
1.817  
1.803  
1.797  
1.786  
1.777  
1.771  
1.669  
1.662  
1.598  
1.592  
1.636  
1.629  
1.596  
1.593  
1.993  
1.604  
1.969  
1.953  
1.571  
1.565  
1.550  
1.550  
1.535  
1.517  
1.517  
1.509  
1.501  
1.501  
1.484  
1.467  
1.442  
1.435  
1.407  
1.761

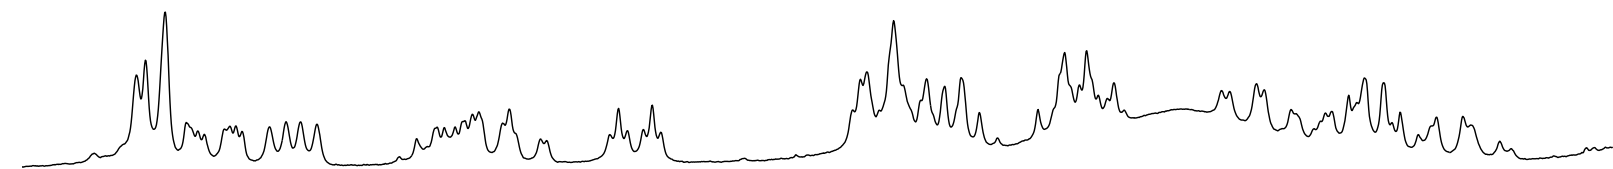

6.923  
6.904  
6.746  
6.728  
6.170  
6.164  
5.383  
5.345  
5.326  
5.307  
5.287  
3.726  
2.692  
2.684  
2.598  
2.551  
2.537  
2.522  
2.376  
2.369  
2.645  
2.347  
2.341  
2.311  
2.238  
2.206  
2.017  
2.010  
2.004  
1.947  
1.930  
1.915  
1.898  
1.842  
1.817  
1.803  
1.797  
1.786  
1.777  
1.771  
1.669  
1.662  
1.598  
1.592  
1.636  
1.629  
1.596  
1.593  
1.571  
1.565  
1.550  
1.550  
1.535  
1.517  
1.517  
1.509  
1.501  
1.501  
1.484  
1.467  
1.442  
1.435  
1.407  
0.923  
0.904  
0.746  
0.728  
0.170  
0.164  
0.383  
0.345  
0.326  
0.307  
0.287  
0.726  
0.692  
0.684  
0.598  
0.551  
0.537  
0.522  
0.376  
0.369  
0.645  
0.347  
0.341  
0.311  
0.238  
0.206  
0.017  
0.010  
0.004  
0.947  
0.930  
0.915  
0.898  
0.842  
0.817  
0.803  
0.797  
0.786  
0.777  
0.771  
0.669  
0.662  
0.598  
0.592  
0.636  
0.629  
0.596  
0.593  
0.571  
0.565  
0.550  
0.550  
0.535  
0.517  
0.517  
0.509  
0.501  
0.501  
0.484  
0.467  
0.442  
0.435  
0.407  
0.864

NAME HB2-6 C 3mg  
EXPNO 1  
PROCNO 1  
Date\_ 20200801  
Time 14.18  
INSTRUM spect  
PROBHD 5 mm PABBO BB-  
PULPROG zg30  
TD 65536  
SOLVENT CDCl3  
NS 22  
DS 2  
SWH 8012.820 Hz  
FIDRES 0.122266 Hz  
AQ 4.0894966 sec  
RG 203  
DW 62.400 usec  
DE 6.50 usec  
TE 296.4 K  
D1 1.00000000 sec  
TDO 1

6.923  
6.904  
6.746  
6.728  
6.170  
6.164  
5.383  
5.365  
5.345  
5.326  
5.307  
5.287  
5.269  
5.249  
3.764  
3.753  
3.743  
3.736  
3.726  
3.715  
3.709  
3.698  
1.128  
1.111  
1.107  
0.999  
0.982  
0.898  
0.881  
0.864

==== CHANNEL f1 =====  
SF01 400.1324710 MHz  
NUC1 1H  
P1 13.90 usec  
SI 32768  
SF 400.1300000 MHz  
WDW EM  
SSB 0  
LB 0.30 Hz  
GB 0  
PC 1.00

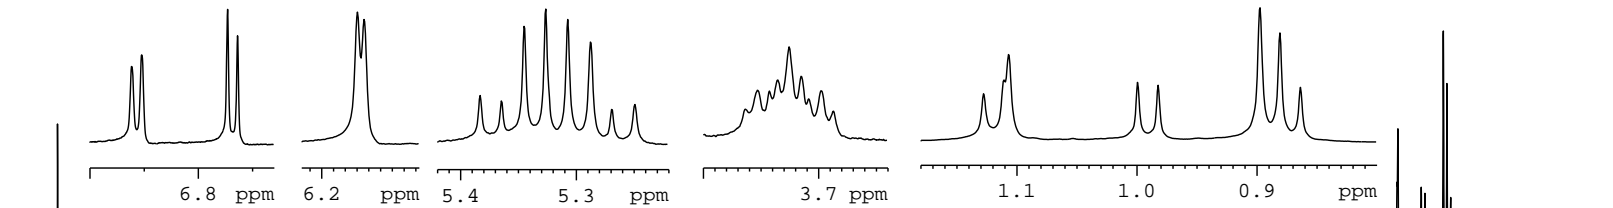

7.0  
6.5  
6.0  
5.5  
5.0  
4.5  
4.0  
3.5  
3.0  
2.5  
2.0  
1.5  
1.0  
ppm

1.15  
1.02  
1.00  
1.22  
1.02  
1.03  
1.91  
1.17  
1.01  
1.03  
1.41  
1.19  
4.87  
3.68  
2.40  
4.51  
6.07  
3.38  
9.10

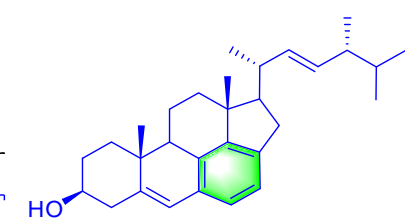

Figure S3. <sup>1</sup>H NMR spectrum of **1** in CDCl<sub>3</sub>.

HB2-6 C 3mg C

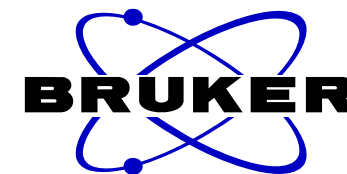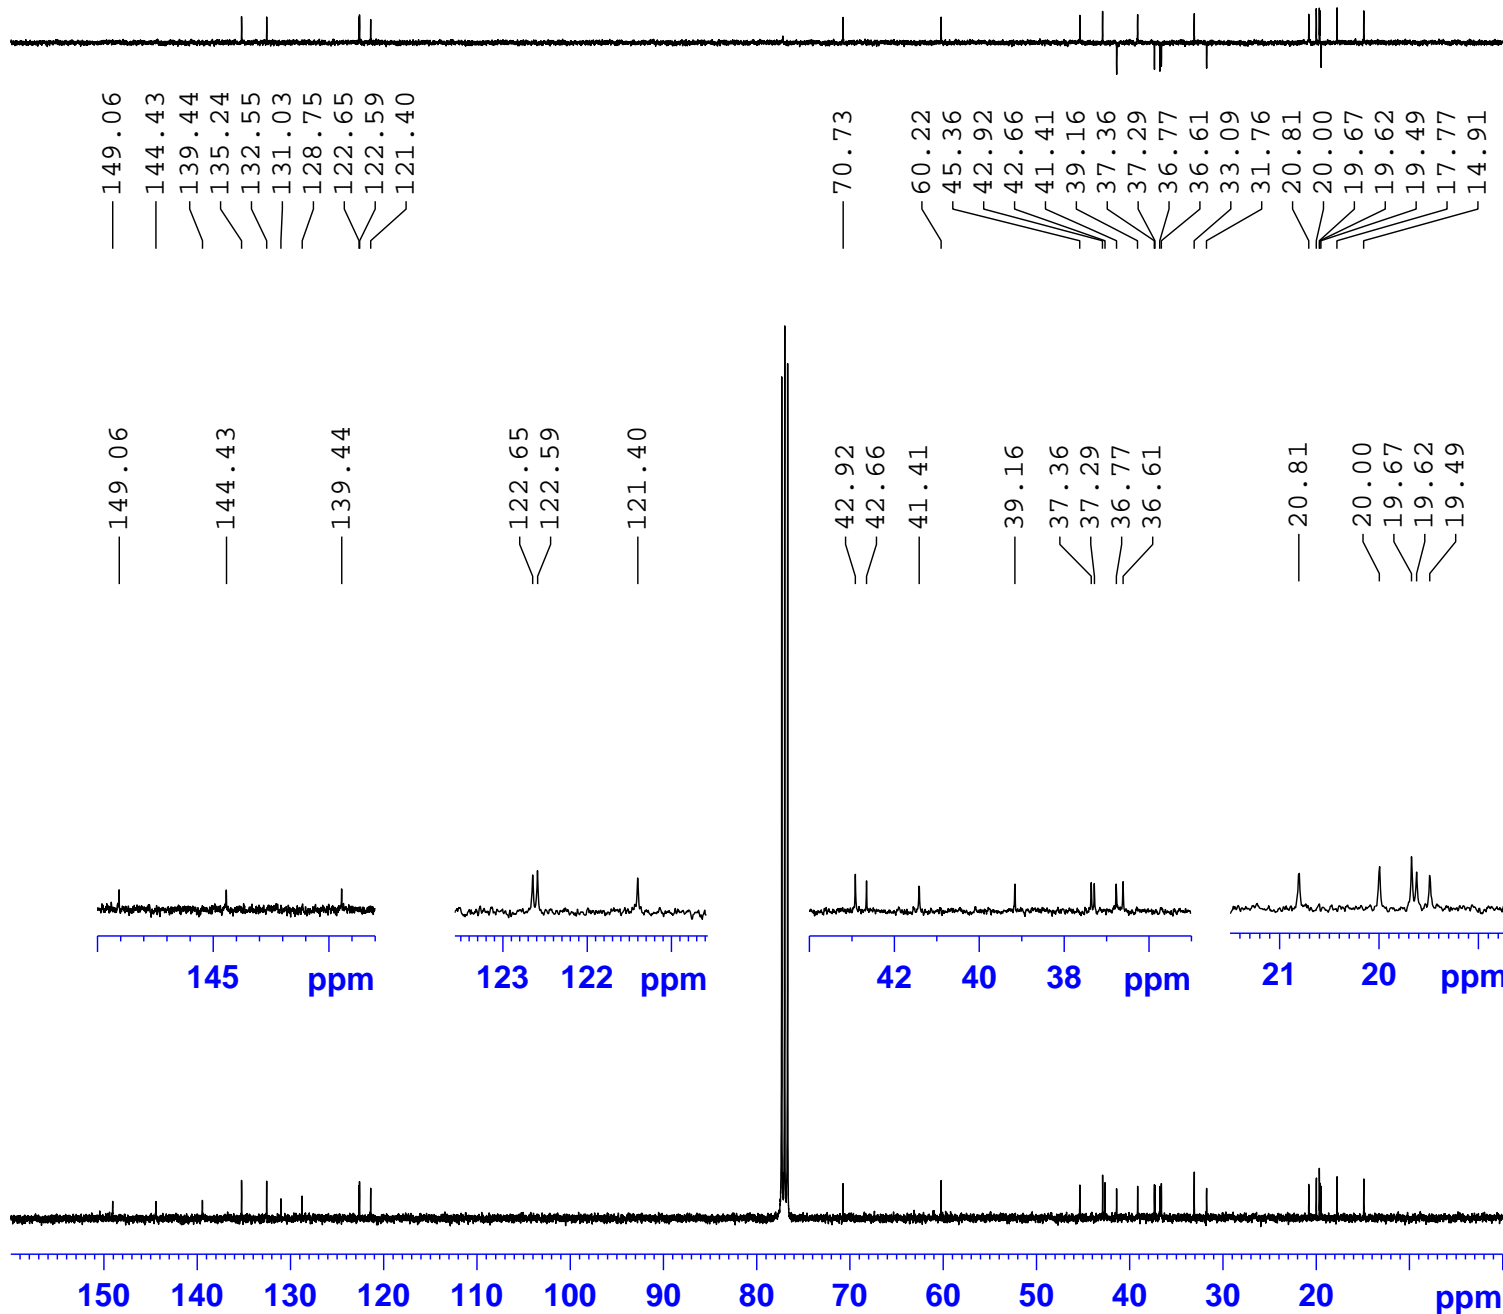

```
NAME          HB2-6 C 3mg
EXPNO          2
PROCNO         1
Date_         20200801
Time          14.21
INSTRUM       spect
PROBHD        5 mm PABBO BB-
PULPROG       zgpg30
TD            65536
SOLVENT       CDCl3
NS            1124
DS            4
SWH           24038.461 Hz
FIDRES        0.366798 Hz
AQ            1.3631988 sec
RG            203
DW            20.800 usec
DE            6.50 usec
TE            296.5 K
D1            2.0000000 sec
D11           0.03000000 sec
TD0           1
```

```
===== CHANNEL f1 =====
SFO1          100.6228293 MHz
NUC1           13C
P1            12.37 usec
SI            32768
SF            100.6127713 MHz
WDW           EM
SSB           0
LB            1.00 Hz
GB            0
PC            1.40
```

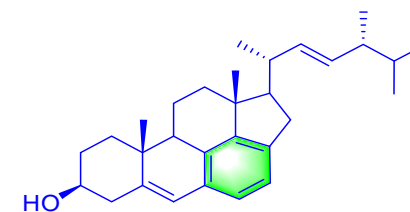

Figure S4. <sup>13</sup>C NMR spectrum of 1 in CDCl<sub>3</sub>.

HB2-6 C 3mg QC

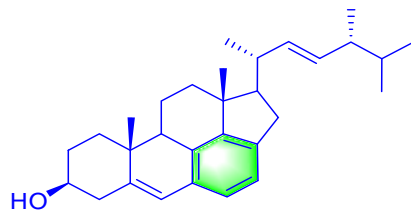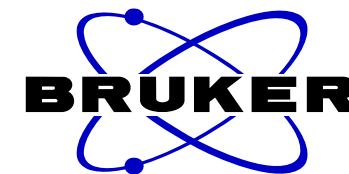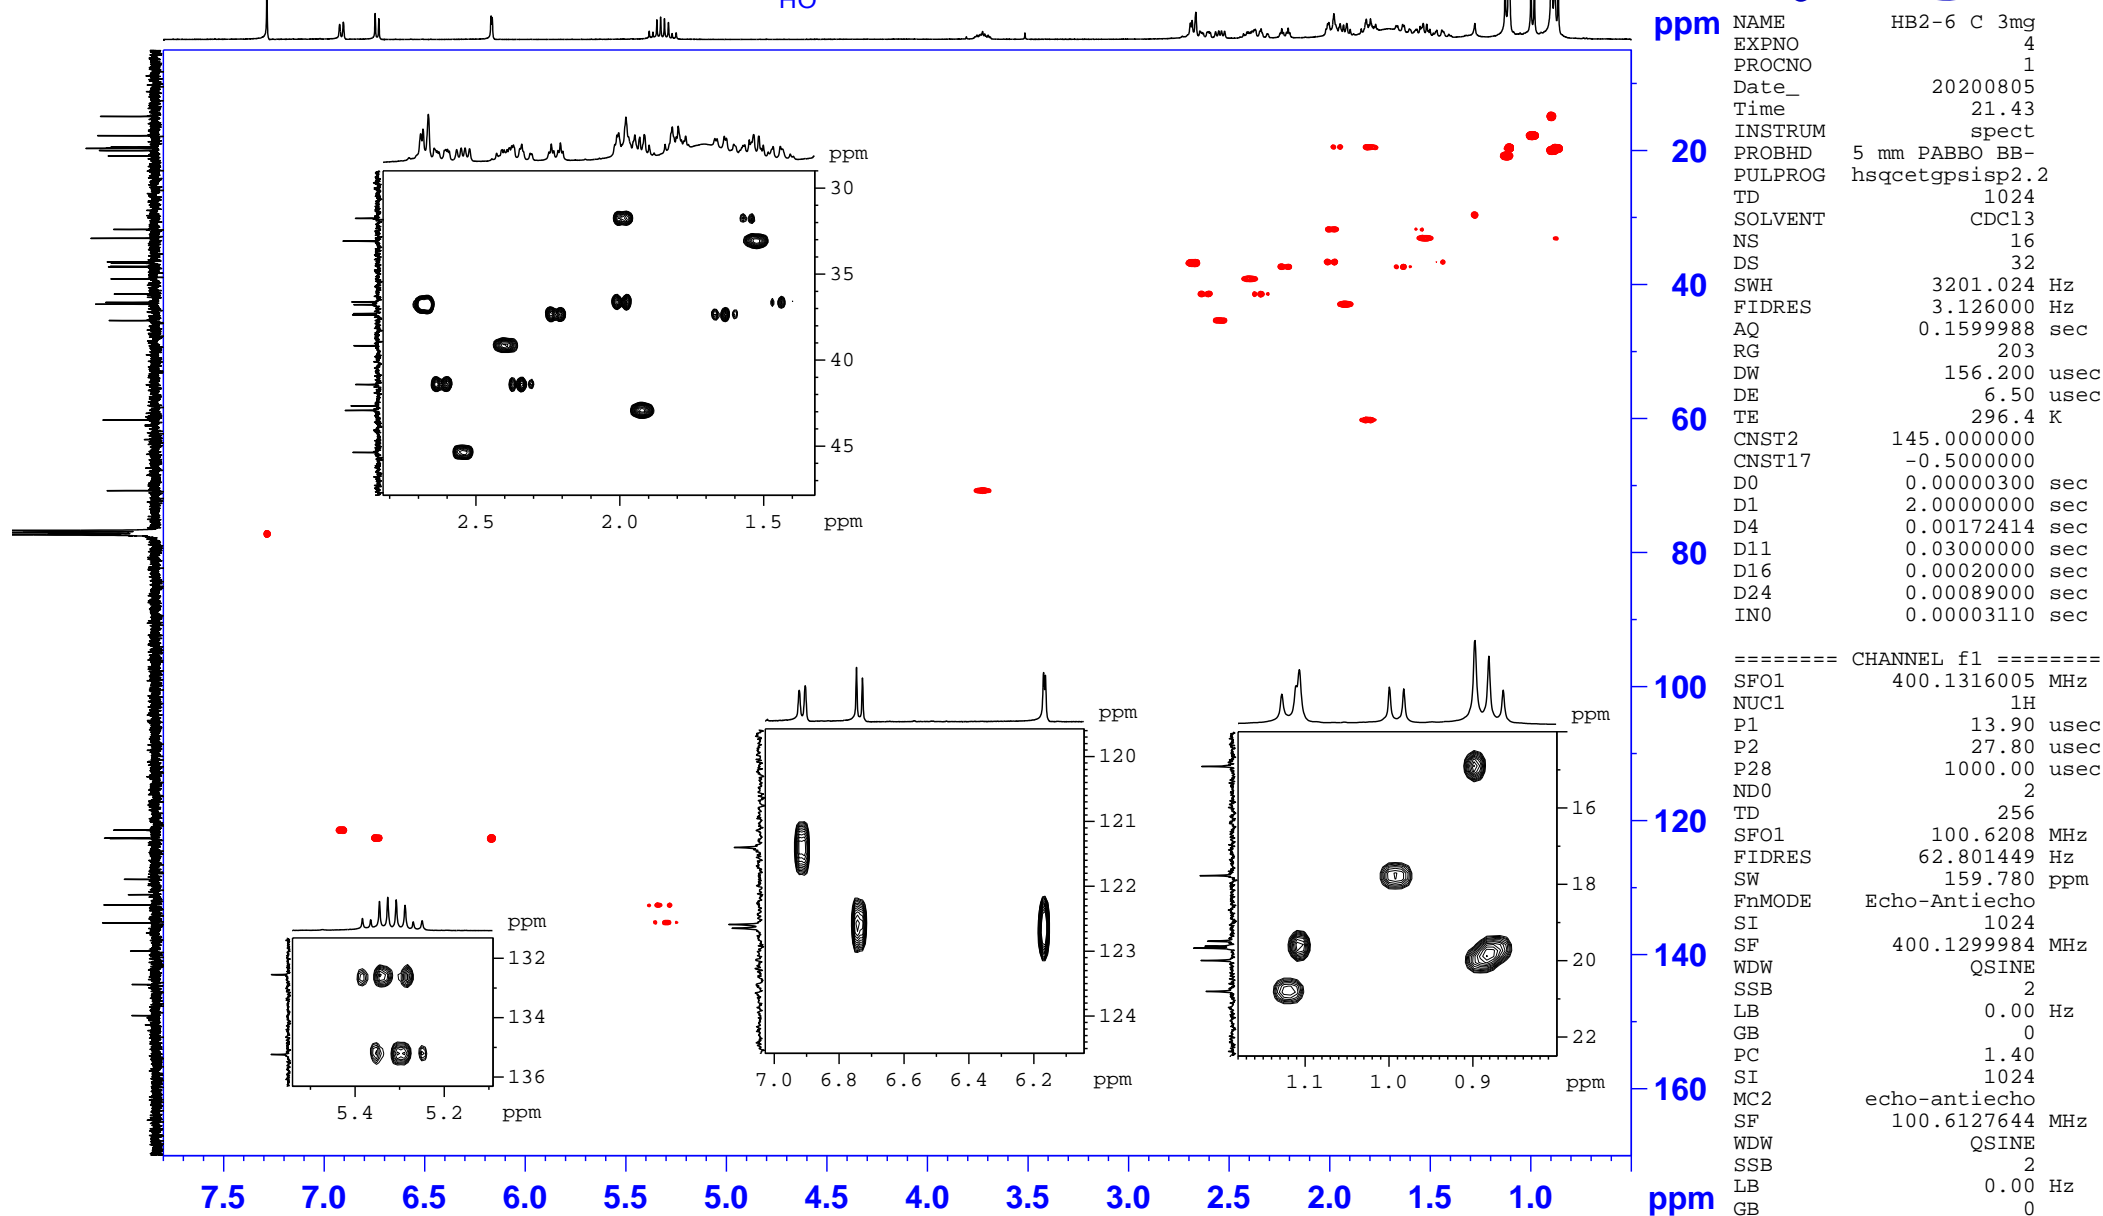

Figure S5. HSQC NMR spectrum of **1** in CDCl<sub>3</sub>.



HB2-6 C 3mg COSY

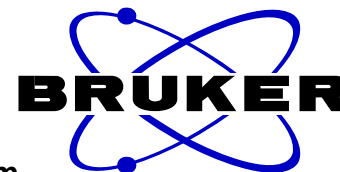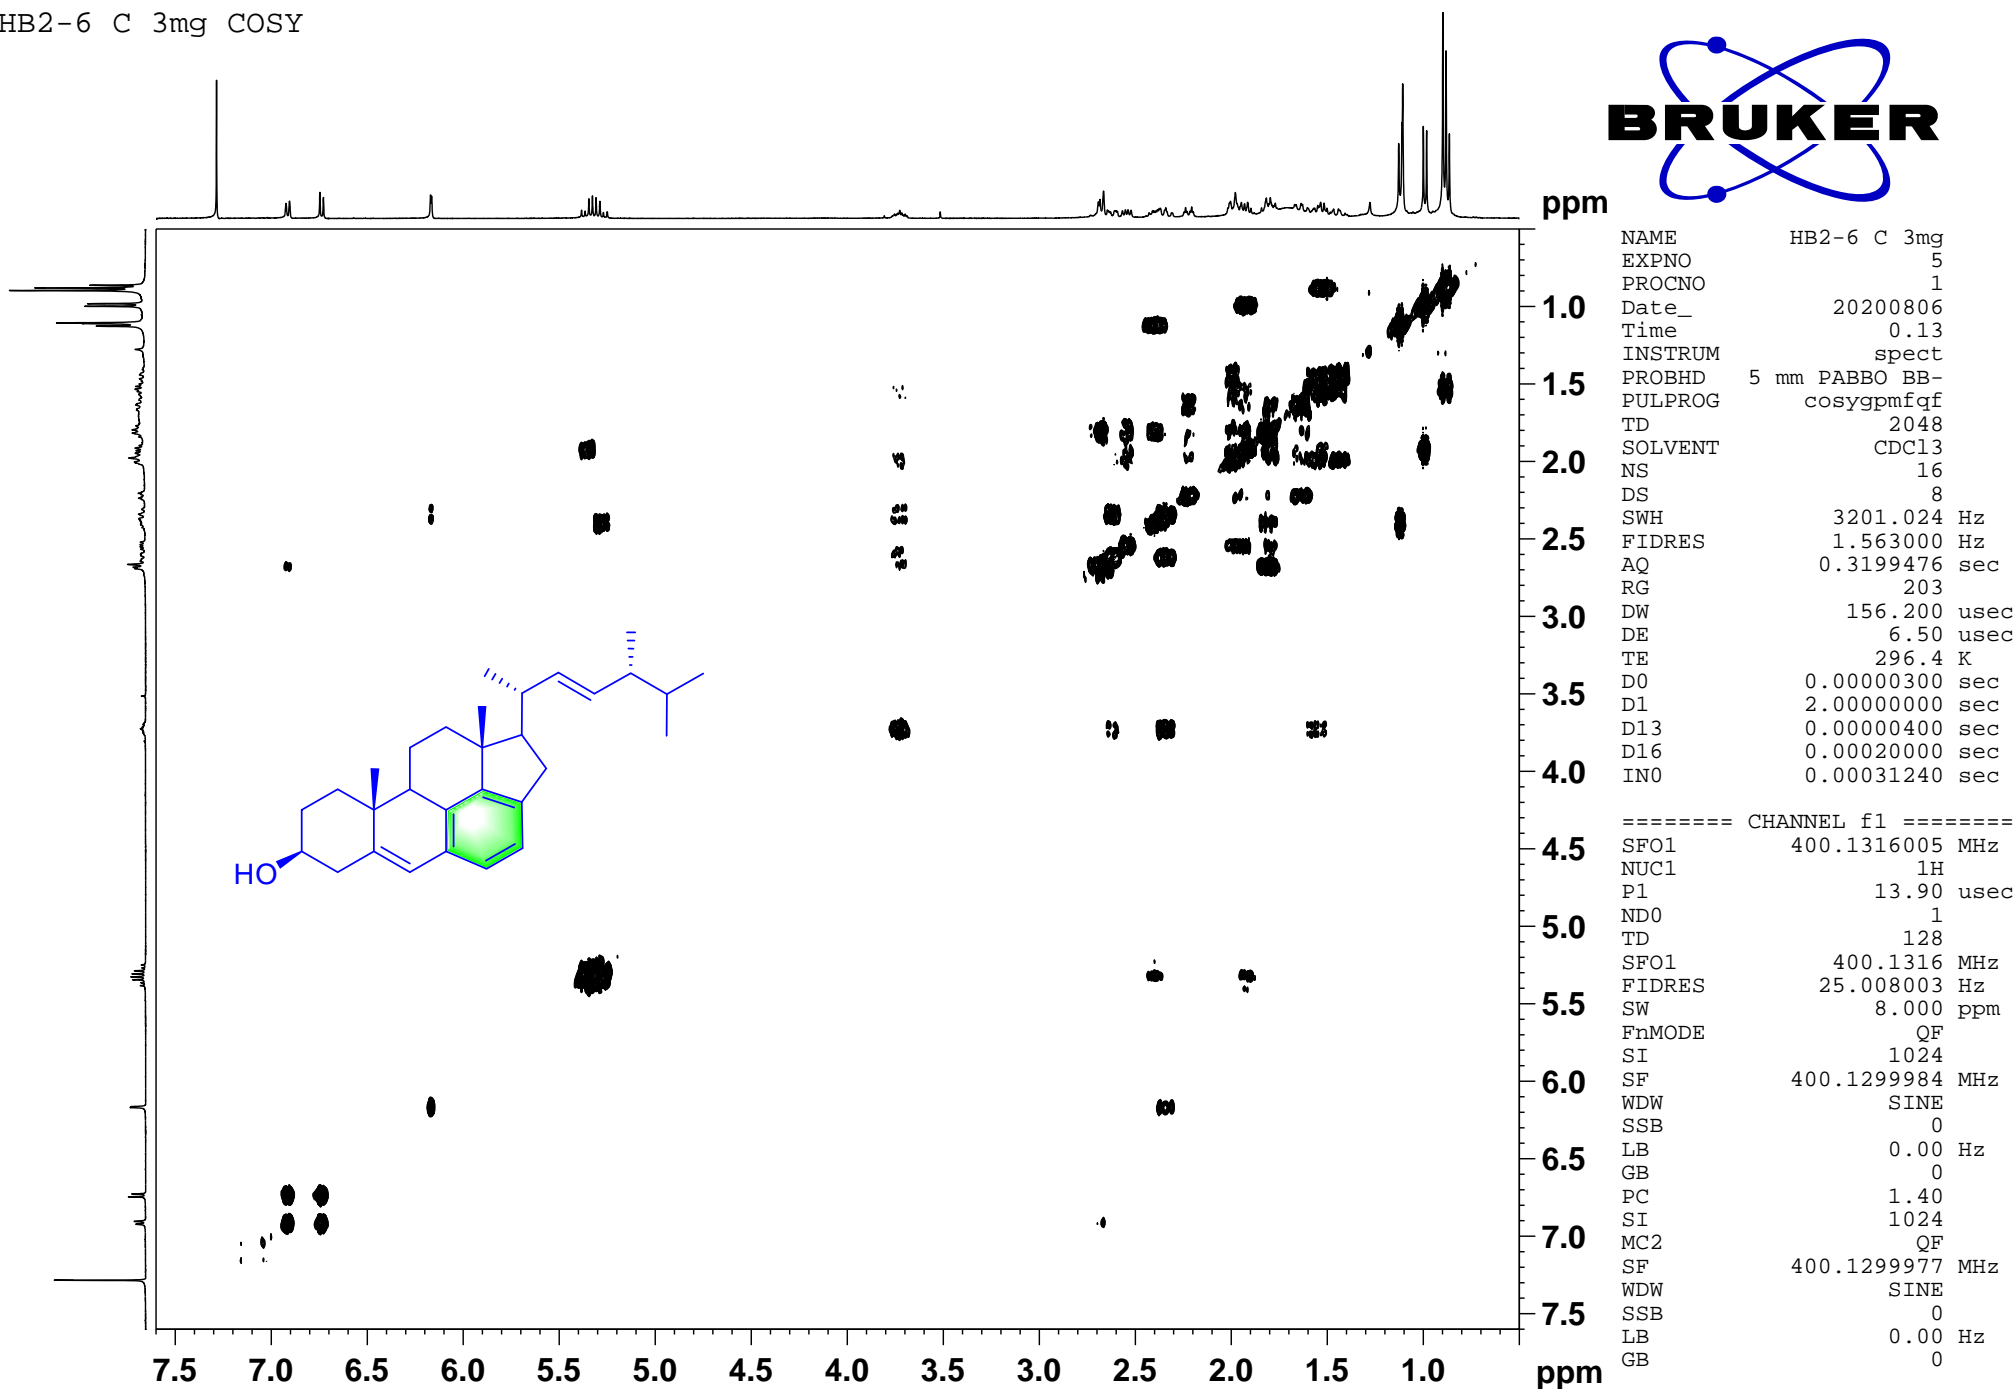

Figure S6. COSY NMR spectrum of 1 in CDCl<sub>3</sub>.

HB2-6 C 3mg BC

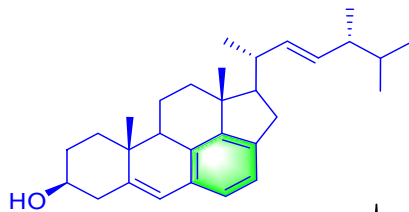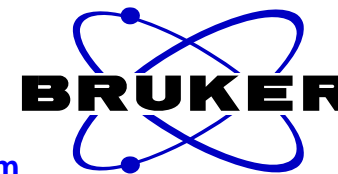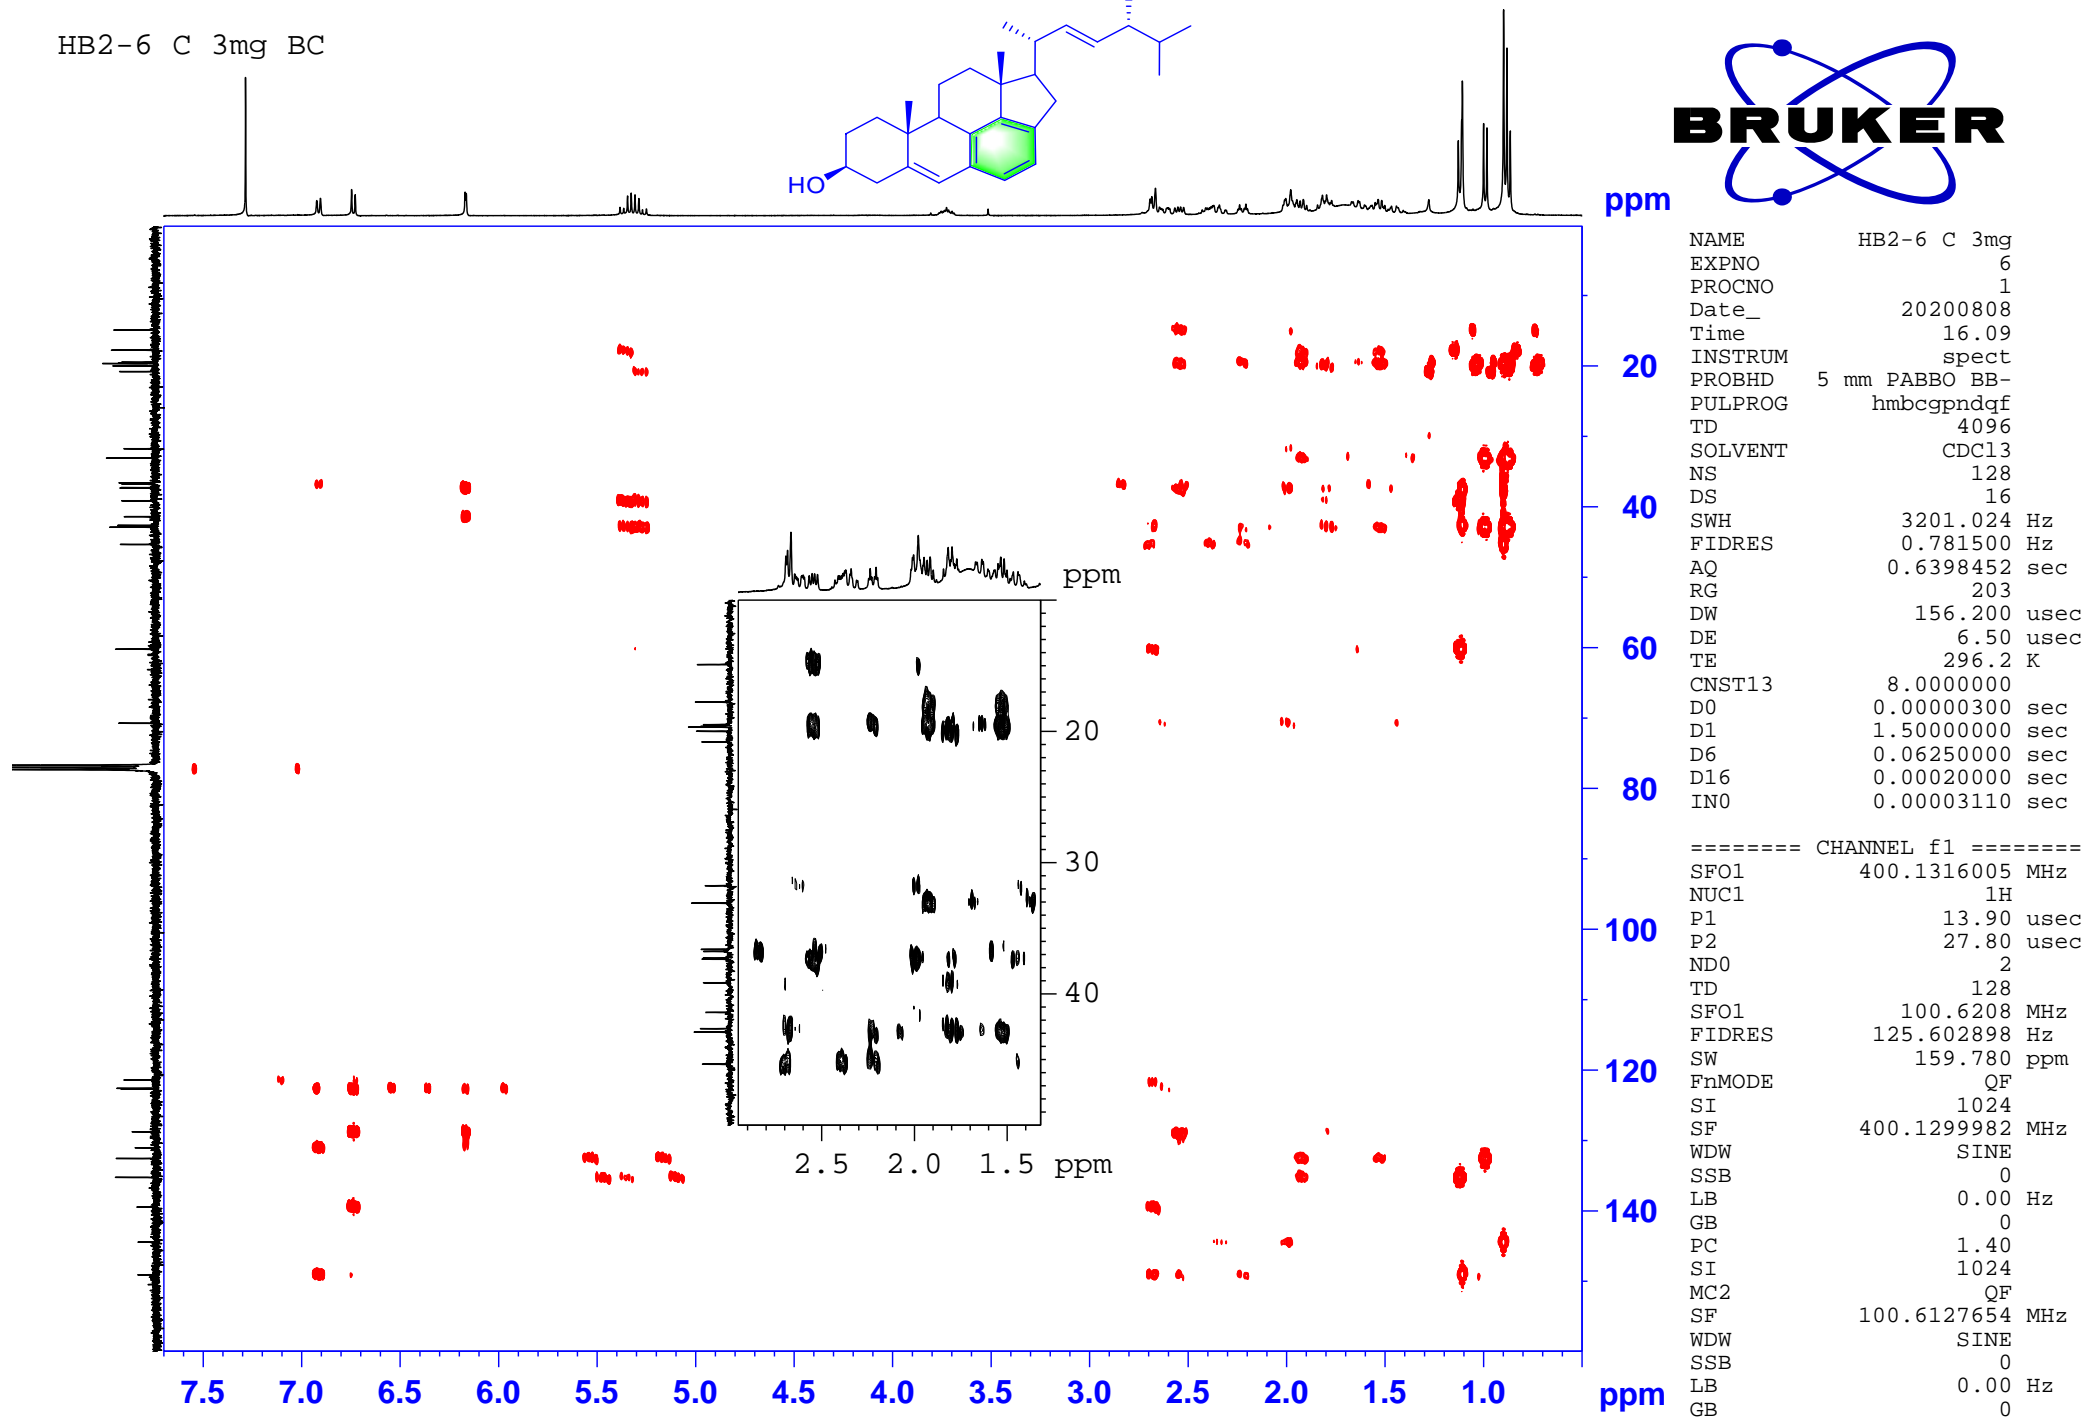

Figure S7. HMBC NMR spectrum of 1 in CDCl<sub>3</sub>.

HB2-6 C 3mg NOE

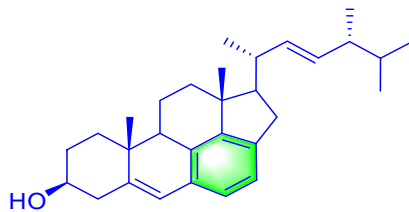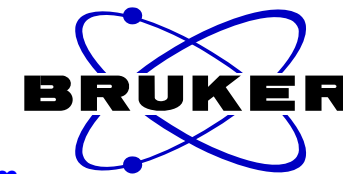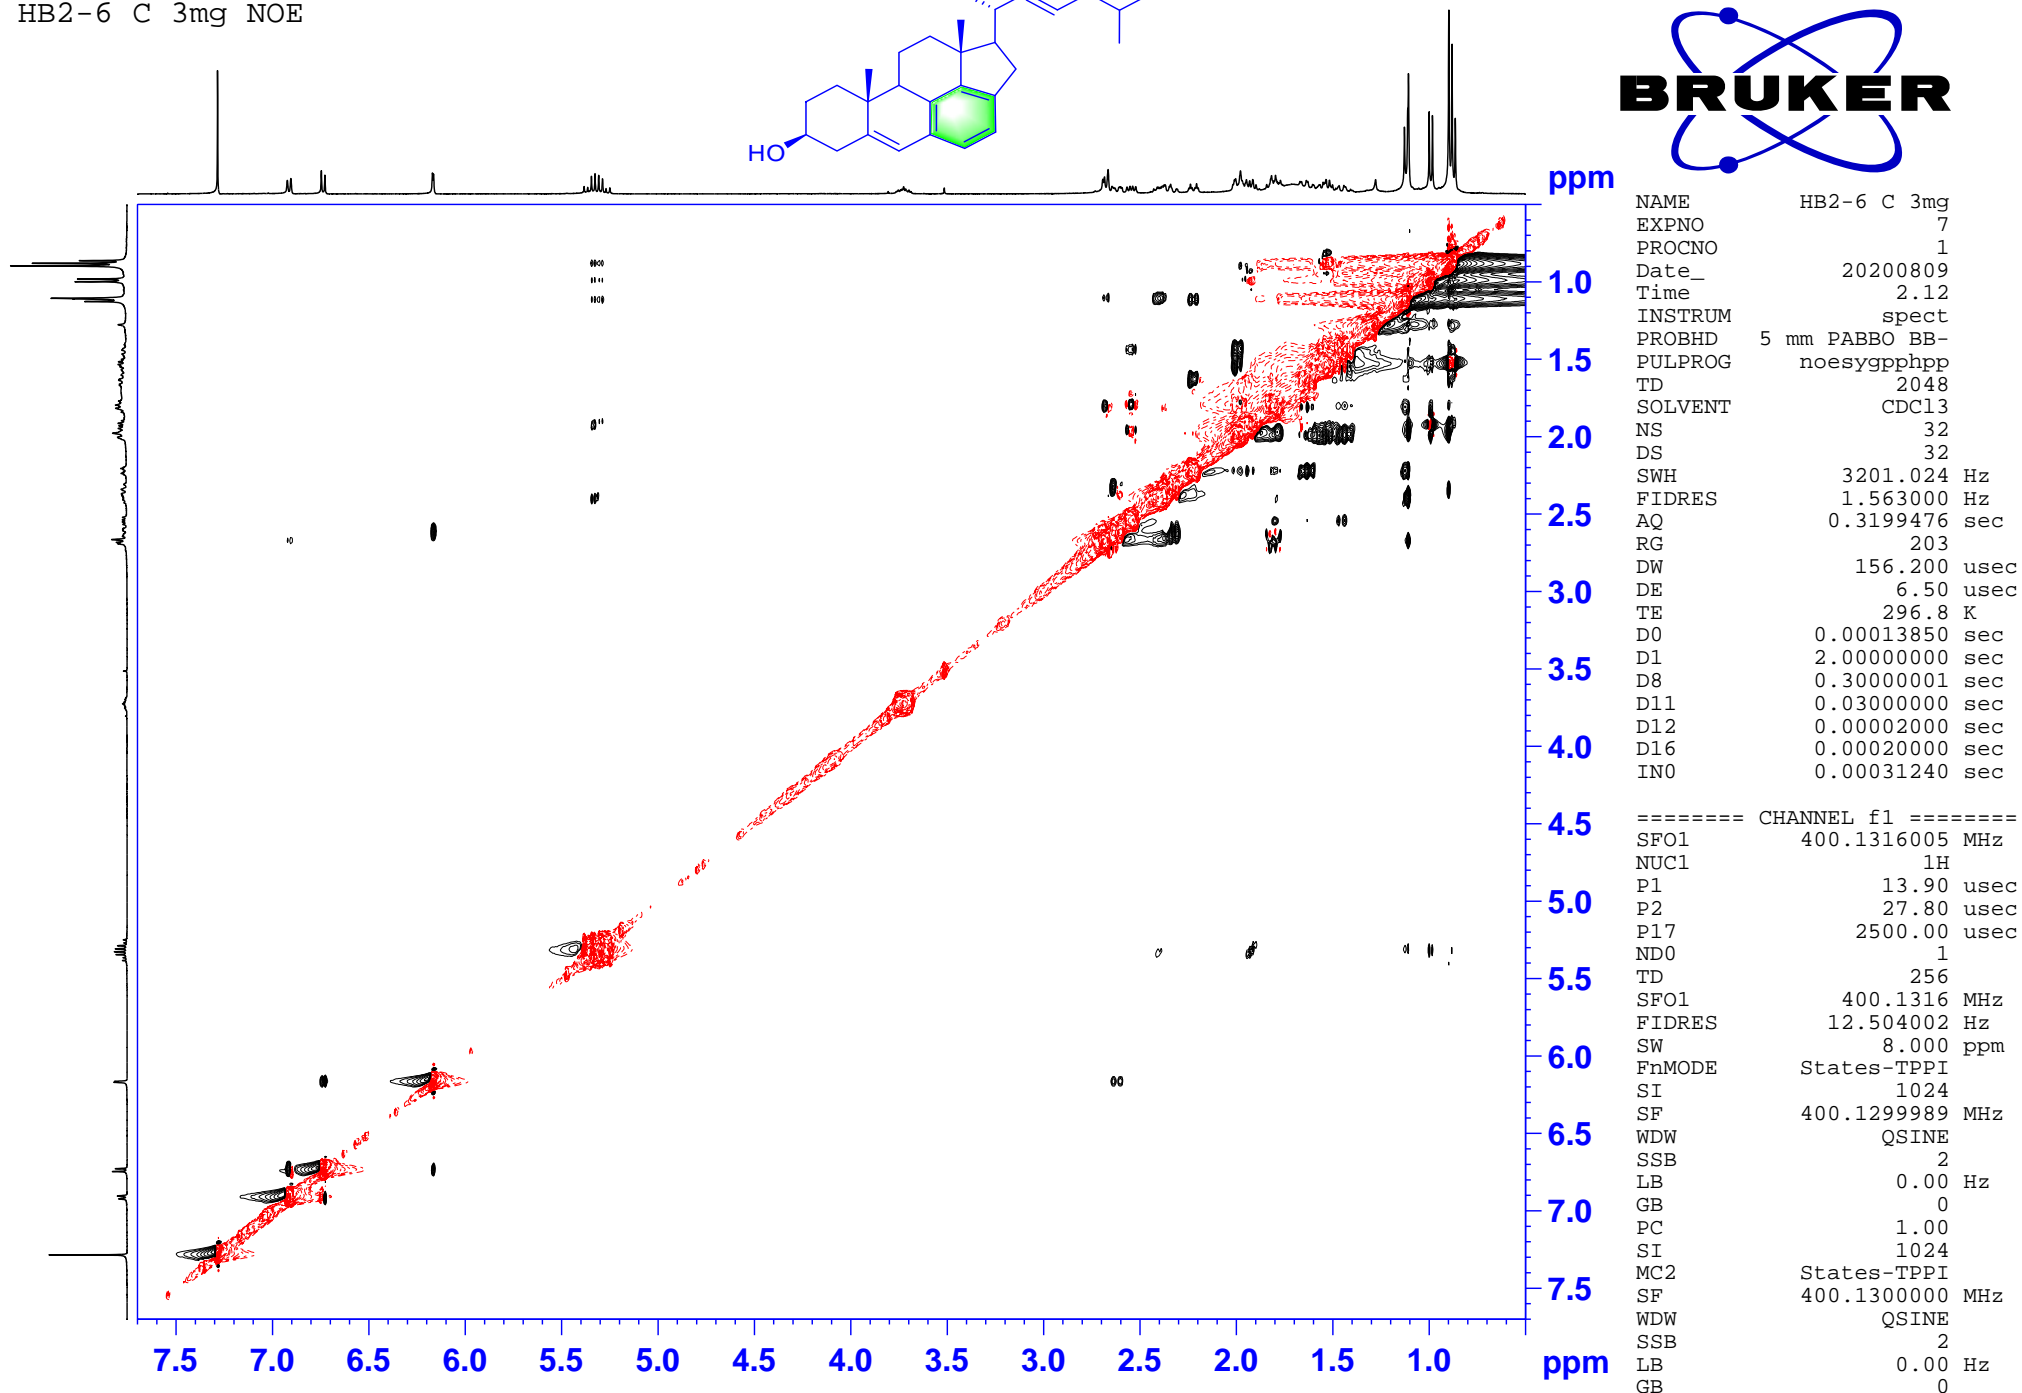

Figure S8. NOESY NMR spectrum of 1 in CDCl<sub>3</sub>.

## Single Mass Analysis

Tolerance = 20.0 mDa / DBE: min = -1.5, max = 50.0

Element prediction: Off

Number of isotope peaks used for i-FIT = 3

Monoisotopic Mass, Even Electron Ions

8 formula(e) evaluated with 1 results within limits (up to 50 closest results for each mass)

Elements Used:

C: 0-30 H: 0-60 O: 0-2 <sup>23</sup>Na: 0-1

HB 2-6-re-Oct 168 (0.651)

1: TOF MS ES+

8.70e+001

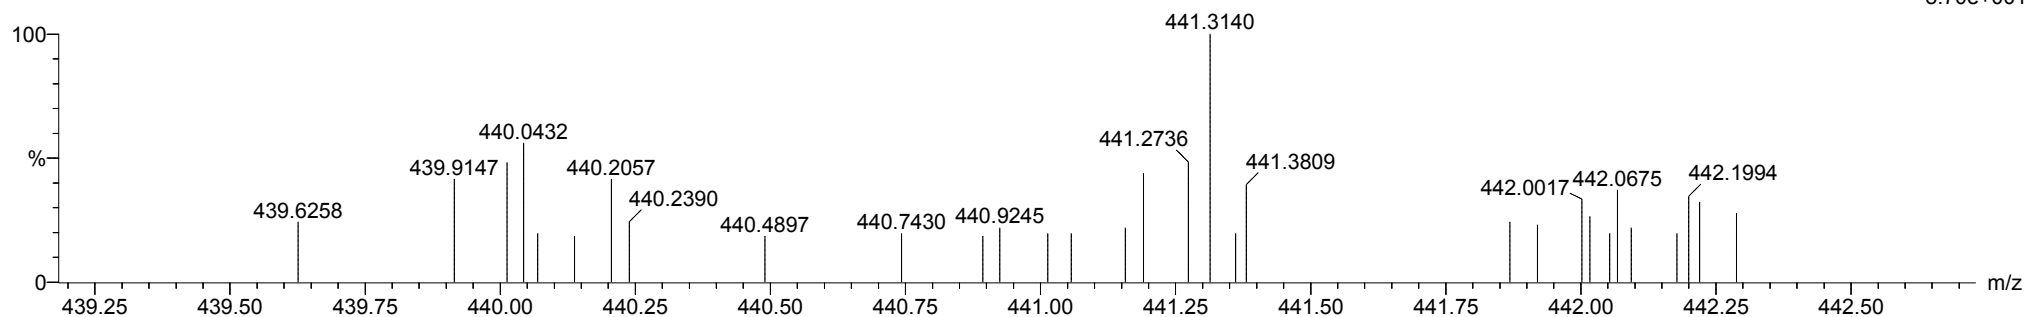

Minimum: -1.5  
Maximum: 20.0 10.0 50.0

| Mass     | Calc. Mass | mDa | PPM | DBE | i-FIT | Norm | Conf (%) | Formula                                            |
|----------|------------|-----|-----|-----|-------|------|----------|----------------------------------------------------|
| 441.3140 | 441.3133   | 0.7 | 1.6 | 9.5 | 93.1  | n/a  | n/a      | C <sub>30</sub> H <sub>42</sub> O <sup>23</sup> Na |

Figure S9. The HR-ESI-MS spectrum of 1.

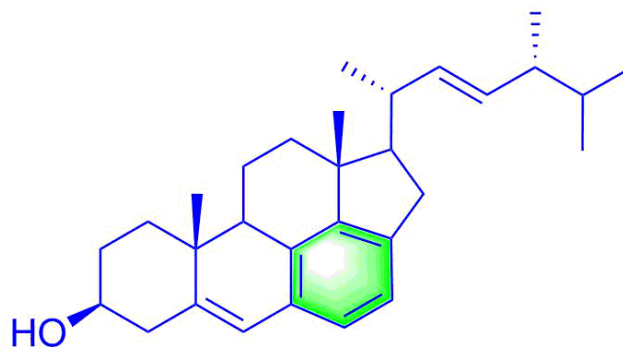Chemical Formula: C<sub>30</sub>H<sub>42</sub>O

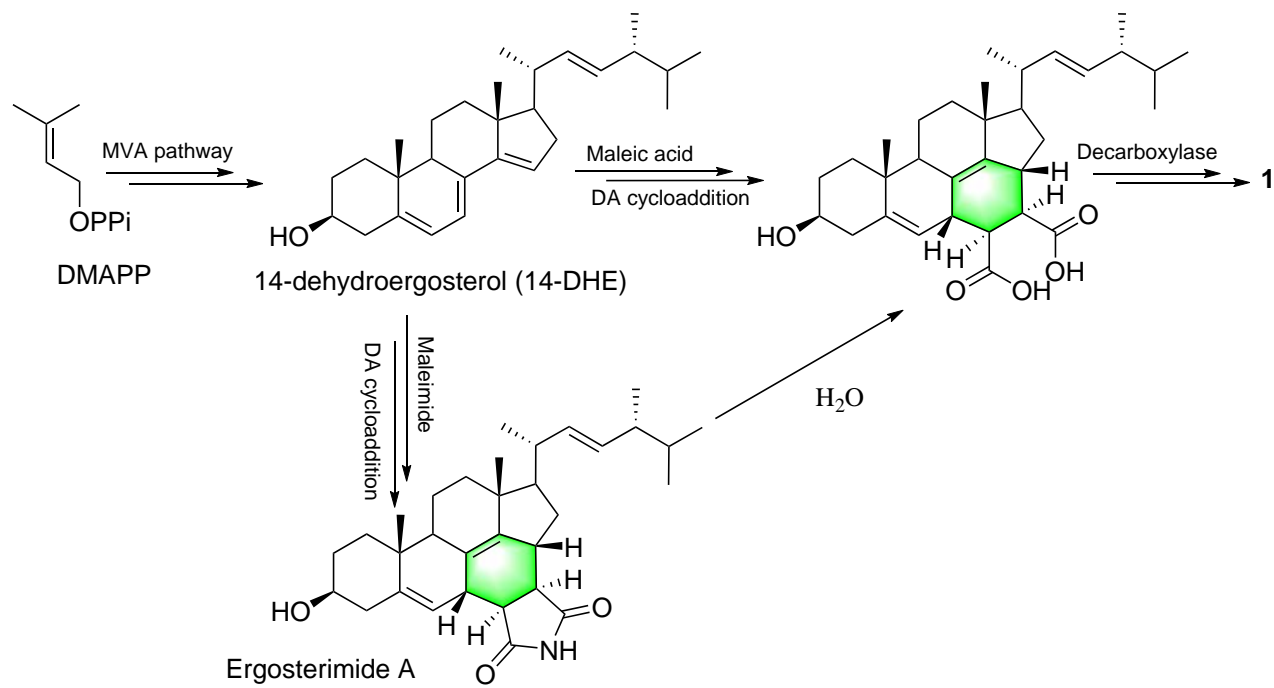

**Figure S10.** A biosynthetic proposal for **1**.
